# Supplementary material for: Epigenetic Marks as Predictors of Metabolic Response to Bariatric Surgery: Validation from an Epigenome Wide Association Study
Source: MDPI journal article supplement (doi:10.3390/ijms241914778), 2023-09-30
Supplement: s1 [file s1]

**Table S1:** Significantly differentially methylated CpG sites selected according to their contribution to the PCA.

| Cpg sites  | Position   | Relation                   | Gene                           | Island position | Location             |
|------------|------------|----------------------------|--------------------------------|-----------------|----------------------|
| cg20707527 | 8 q23.1    | Genetic                    | ZFPM2                          | S_Shore         |                      |
| cg20381372 | 19 q13.12  | Intergenic                 | LOC100134317                   | S_Shelf         | TSS1500              |
| cg20022036 | 6 p21.32   | Genetic                    | HLA-DRB1                       | N_shelf         | Body                 |
| cg15084585 | 8 q23.1    | Genetic                    | ZFPM2                          | S_Shore         |                      |
| cg23024343 | 7 q22.3    | Genetic                    | COG5                           | N_Shelf         | Body                 |
| cg20485733 | 17 p13.3   | Genetic                    | RAP1GAP2                       | Open Sea        | Body                 |
| cg20239921 | 7 q 11.23  | Genetic<br>(Pseudogene)    | DTX2P1-<br>UPK3BP1-<br>PMS2P11 | Open Sea        | Body                 |
| cg07040661 | 11 p15.5   | Genetic                    | MUC2                           | N_Shelf         | Body                 |
| cg25458175 | 19 q13.43  | Genetic                    | ZBTB45                         | Island          | Body                 |
| cg07180897 | 6 p21.32   | Genetic                    | HLA-DQB2                       | N_Shore         | Body                 |
| cg08720517 | 5 q 31.2   | Genetic                    | PROB1                          | Island          | 1 <sup>st</sup> Exon |
| cg14073541 | 9 q 33.3   | Genetic                    | DENND1A                        | Open Sea        | Body                 |
| cg07458466 | 12 p 12.2  | Genetic                    | PLCZ1                          | Open sea        | Body                 |
| cg09642739 | 8 p 11.21  | Genetic                    | HOOK3                          | Open Sea        | Body                 |
| cg22949274 | 11 q 23.1  | Genetic                    | SDHD                           | S_Shelf         | Body                 |
| cg01437515 | 1 p 36.33  | Genetic                    | TNFRSF4                        |                 |                      |
| cg24840300 | 19 p13.3   | Genetic                    | PLPR3                          | Island          | 3'UTR                |
| cg25828445 | 12 p13.31  | Intergenic<br>(Pseudogene) | NIFKP3                         | S_Shore         |                      |
| cg11445109 | 10 q26.3   | Genetic                    | CYP2E1                         | S_Shore         | Body                 |
| cg19469447 | 10 q26.3   | Genetic                    | CYP2E1                         | Island          | Body                 |
| cg17172308 | 6 q27      | Intergenic                 | FRMD1                          | S_Shelf         |                      |
| cg05473257 | 10 q26.3   | Genetic                    | CYP2E1                         | Island          | Body                 |
| cg14906510 | 12 p 13.31 | Genetic                    | NIFKP3                         | Island          |                      |
| cg05194426 | 10 q26.3   | Genetic                    | CYP2E1                         | S_Shore         | Body                 |
| cg23400446 | 10 q26.3   | Genetic                    | CYP2E1                         | Island          | Body                 |
| cg26805839 | 9p24.2     | Genetic                    | SLC1A1                         | Open Sea        | Body                 |
