# Supplementary figures and images for: Epigenetic Marks as Predictors of Metabolic Response to Bariatric Surgery: Validation from an Epigenome Wide Association Study
Source: MDPI journal article supplement (doi:10.3390/ijms241914778), 2023-09-30

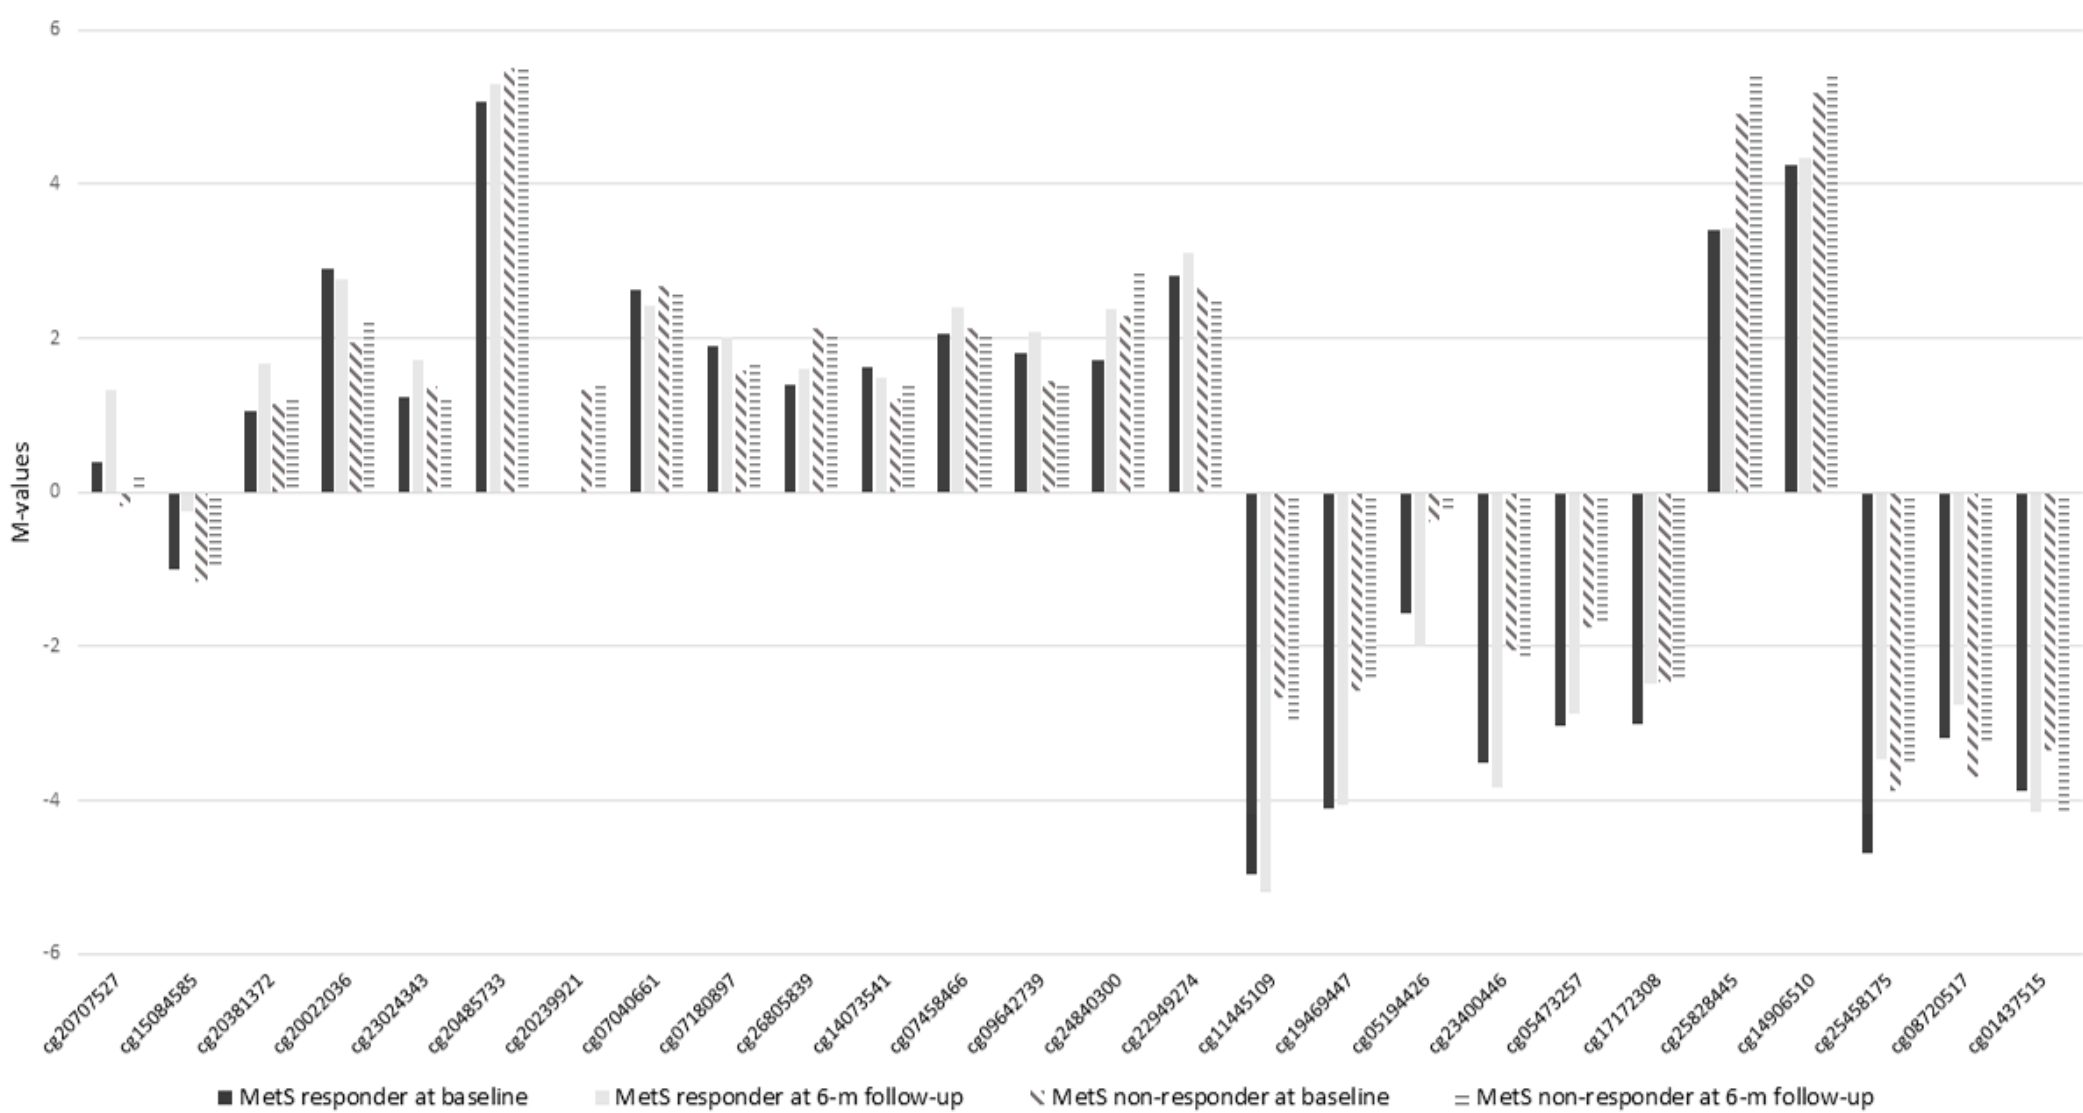

Supplement: s1 [file s1]
